# Supplementary material for: Intranasal influenza-vectored vaccine expressing pneumococcal surface protein A protects against Influenza and Streptococcus pneumoniae infections
Source: PubMed Central journal article supplement — NPJ Vaccines. 2024 Dec 19;9:246. doi: 10.1038/s41541-024-01033-5 (PMC11659394; doi:10.1038/s41541-024-01033-5), 2024-12-19
Supplement: 41541_2024_1033_MOESM1_ESM.pdf [file 41541_2024_1033_MOESM1_ESM.pdf]

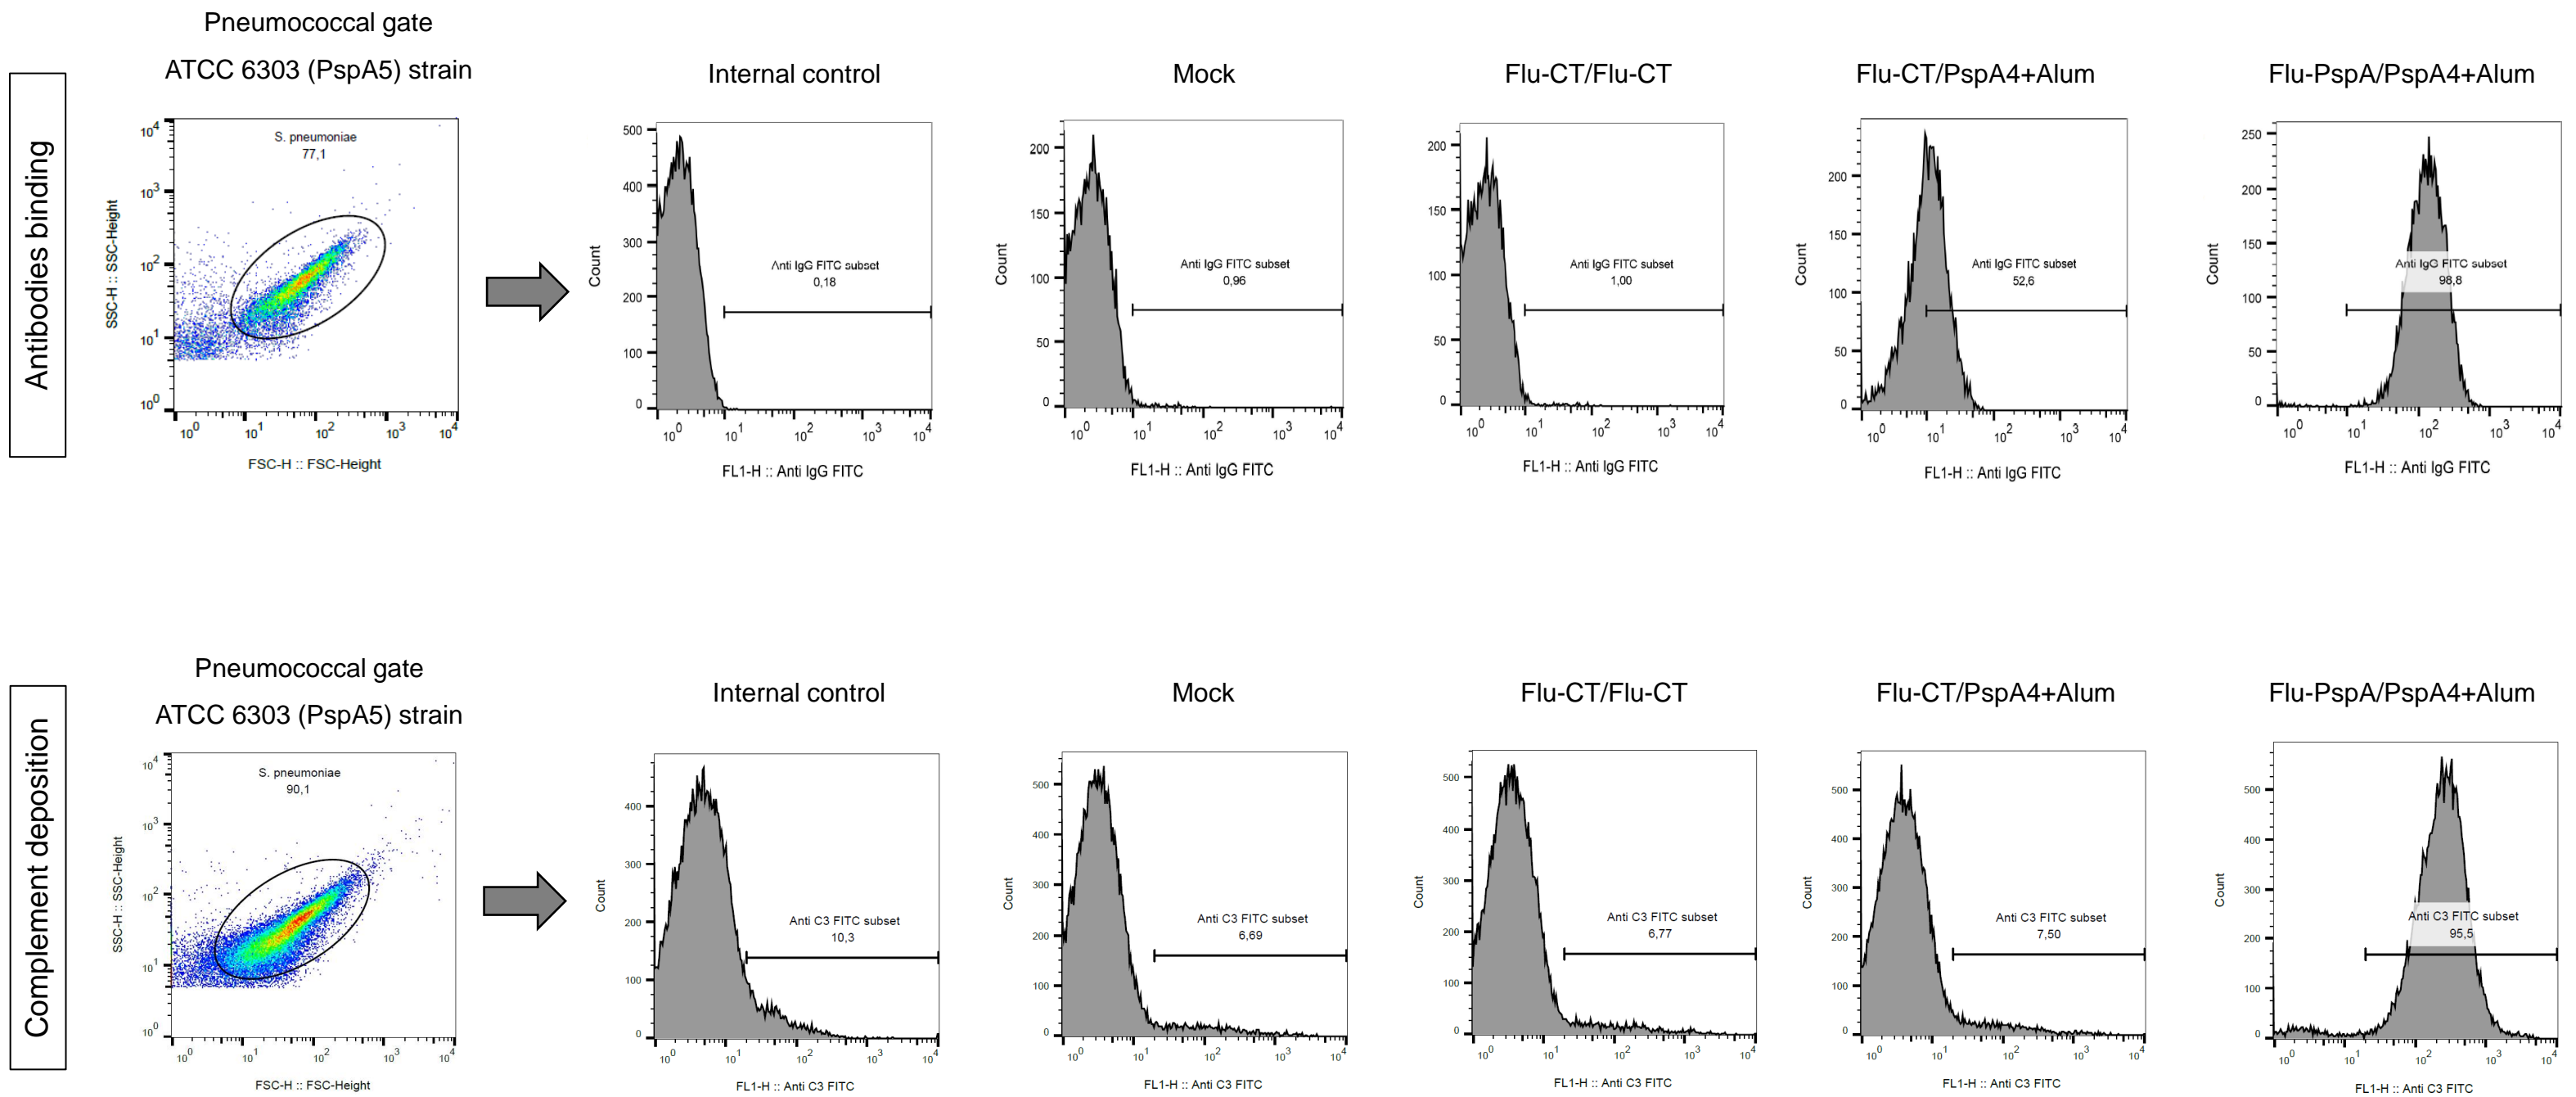

**Supplementary Figure 1 – Analysis strategy to assess anti-PspA4 IgG antibody binding and complement deposition on the pneumococcal surface.** A biparametric graph of size (FSC) versus granularity (SSC) was used to select the “gate” of bacteria according to morphometric aspects and histogram representative of cell distribution by the percentage of positive cells.
